# Supplementary material for: Development of a mobile, automated, optical inspection system for radioactive barrels
Source: Copernicus journal article supplement (doi:10.5194/sand-1-3-2021), 2021-11-10
Supplement: Supplementary file 1 [file sand-1-3-2021-supplement.pdf]

Supplement of Saf. Nucl. Waste Disposal, 1, 3–4, 2021  
<https://doi.org/10.5194/sand-1-3-2021-supplement>  
© Author(s) 2021. CC BY 4.0 License.

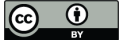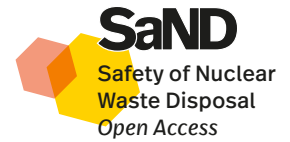

*Supplement of*

## **Development of a mobile, automated, optical inspection system for radioactive barrels**

**Tania Barretto et al.**

*Correspondence to:* Tania Barretto ([tania.barretto@kit.edu](mailto:tania.barretto@kit.edu)) and Eric Rentschler ([eric.rentschler@kit.edu](mailto:eric.rentschler@kit.edu))

The copyright of individual parts of the supplement might differ from the article licence.

# EMOS: Development of a mobile, automated, optical inspection system for radioactive drums

Tania Barretto, Eric Rentschler, Melanie Müßle

Institute of Technology and Management in Construction (TMB) – Deconstruction and Decommissioning of Conventional and Nuclear Buildings

*SafeND – Interdisziplinäres Forschungssymposium für die Sicherheit der nuklearen Entsorgung*

*November 11<sup>th</sup>, 2021 Berlin*

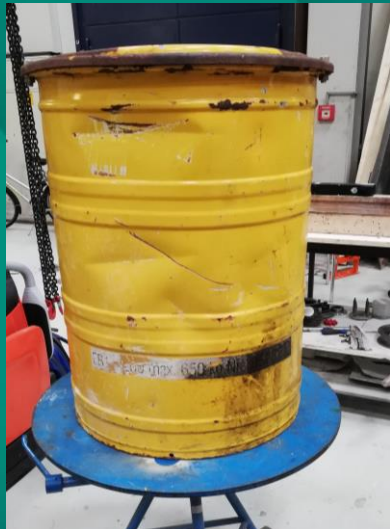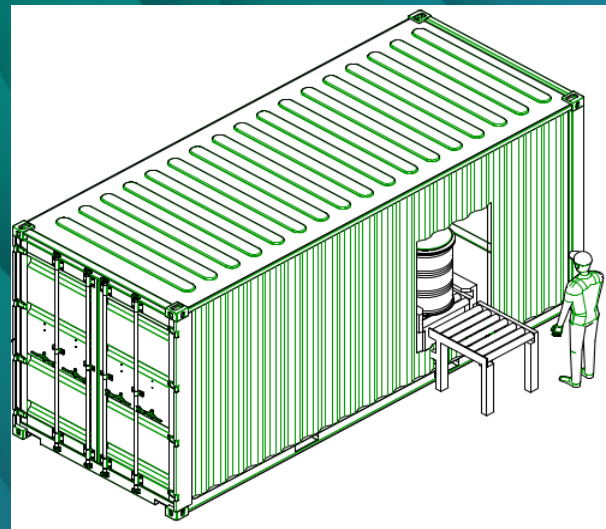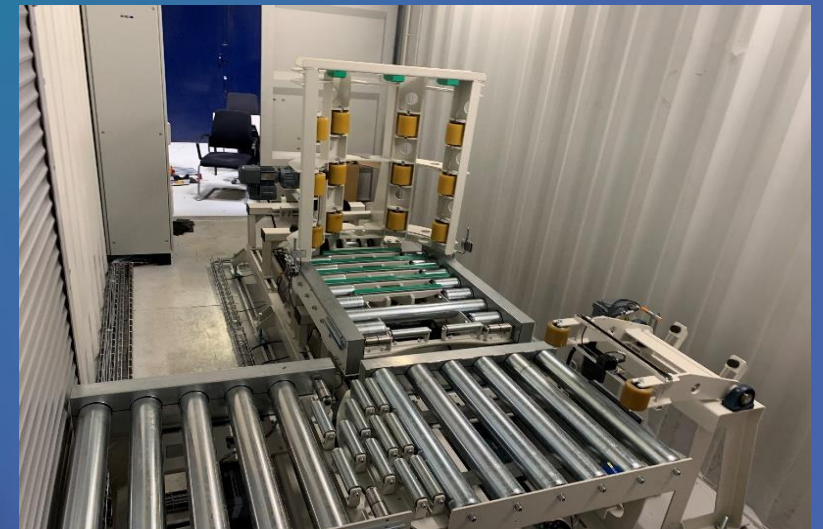

# Agenda

- The research project - **EMOS**
  - Field of application
  - Goals
- Concept
  - Requirements and boundary conditions
  - Setting of Inspection unit and components
  - Inspection process
- Outlook
  - Time line

# The research project - EMOS

- **EMOS** - Development of a mobile, automated, optical inspection system for radioactive drums
- Sponsored by:  Federal Ministry of Education and Research
  - BMBF Sponsoring Programme „Research for the dismantling of nuclear facilities “ (FORKA)
  - Sponsoring number BMBF: FKZ 15S9420
- Research cooperation within the KIT
  - Institute of Technology and Management in Construction (**TMB**)
  - Institute of Photogrammetry and Remote Sensing (**IPF**)

# Field of application

## ■ Problem:

- Detection of geometry and corrosion damage to the drum

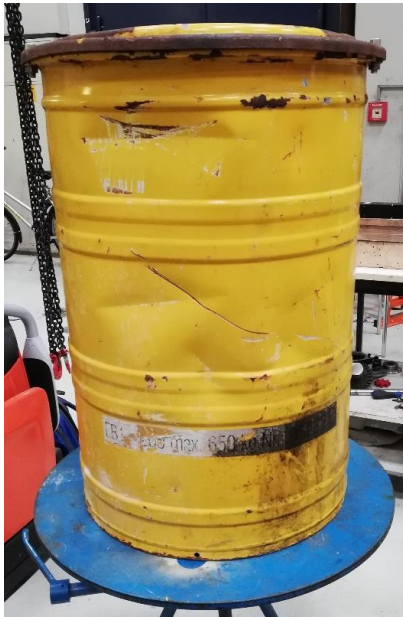

## ■ Approach:

- Automatical detection of damage to new and stored drums
- categorization
- If necessary, initiate consequences to minimize damage

# Goals of the research project

- Increase in **Safety** during interim storage of nuclear waste
  - All-round, objective (reproducible), optical inspection with parallel documentation and archiving
  - Backtracking of damage development by continuous monitoring
  - Prevent the drums from loss of integrity
- Increase in **occupational safety**: staff is less exposed to radiation
  - Automation
- **Time Gain** in the inspection of the drums
  - Automatic handling; evaluation of entire drum surface
  - electronic storage and documentation of the results
  - Output of inspection report

## ■ Requirements

- Mobile inspection unit
- Optical and geometrical recording of the whole drum surface, including top (lid) and bottom, to detect damage like:
  - Corrosion
  - Bumps / wells
  - Scratches / cracks
- Collected data will be automatically analyzed by a software, digitally saved and an inspection report will be generated

## ■ Boundary conditions of the research project

- 200 L– drums (A200, R200, RRF200)
- Low active waste

# Concept

## ■ Setting of inspection unit and components

20ft High Cube Container with a rolling gate at the long side

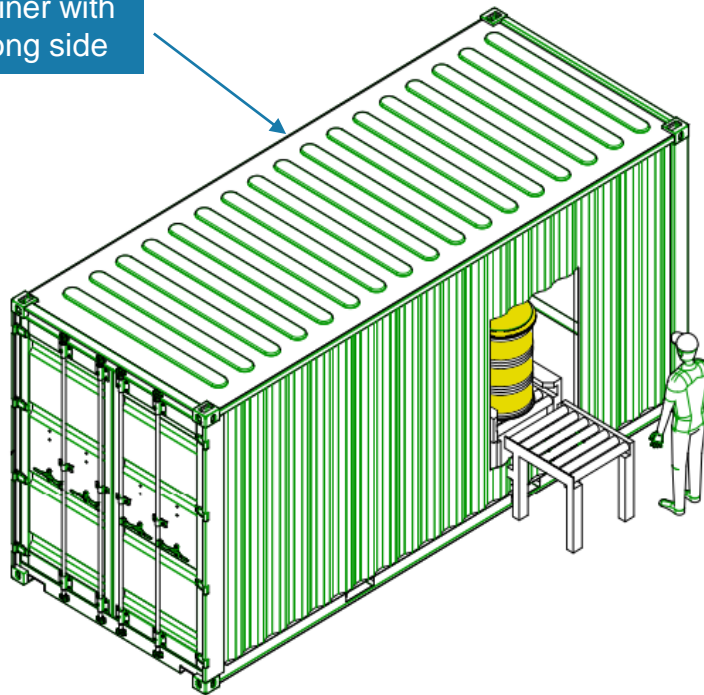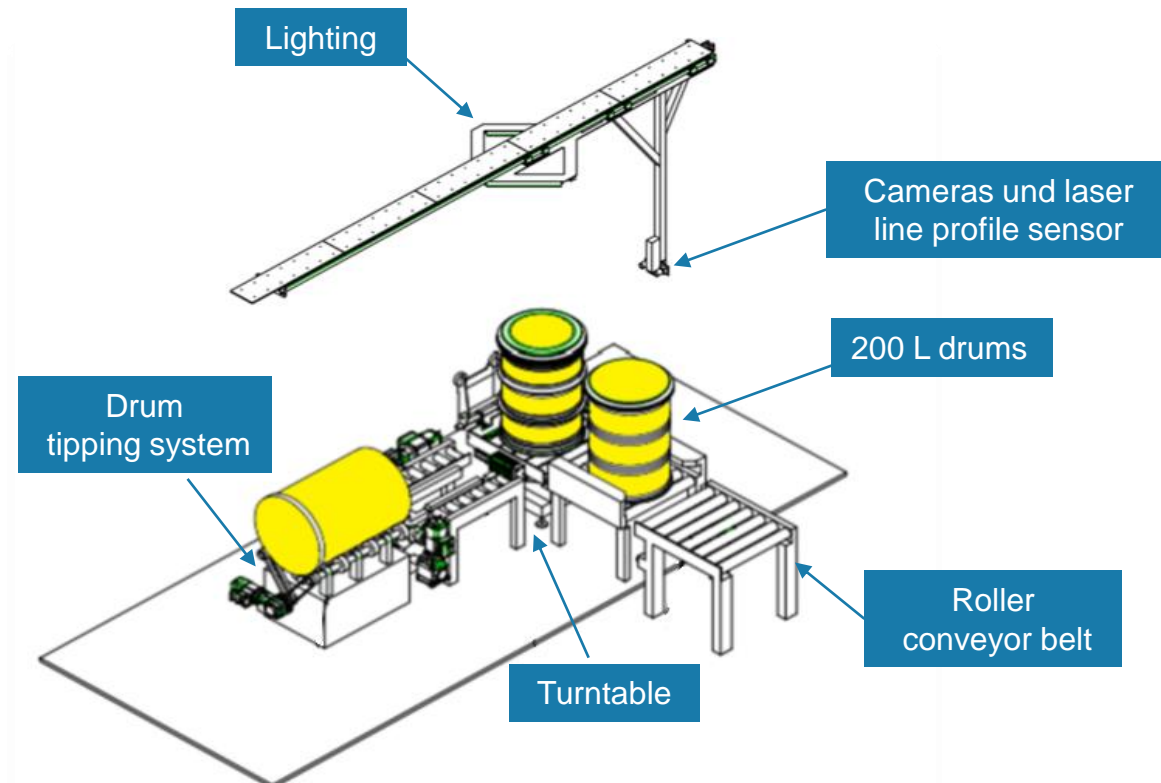



# Inspection process

- **Step 1** – Drum is carried to the **turntable** and gets centered

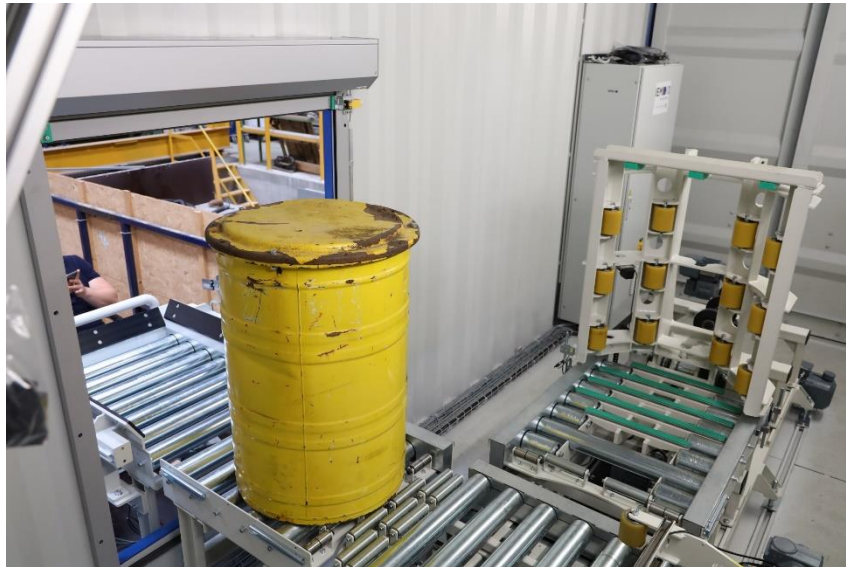

Turntable

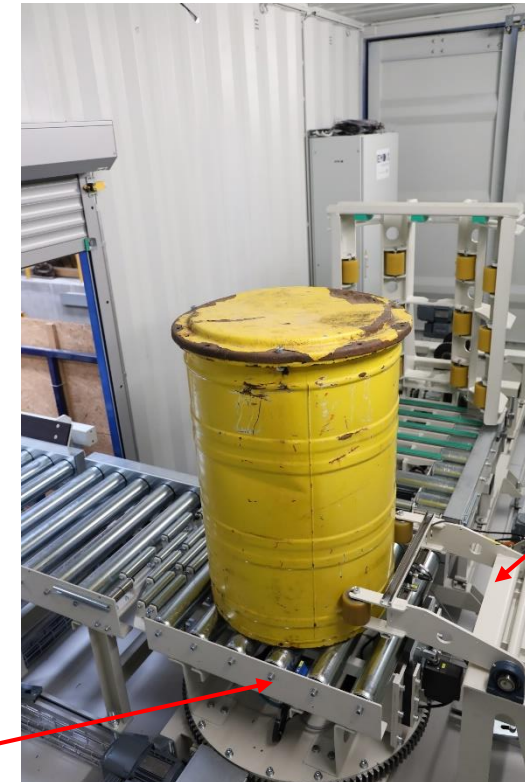

Drum centering

# Inspection process

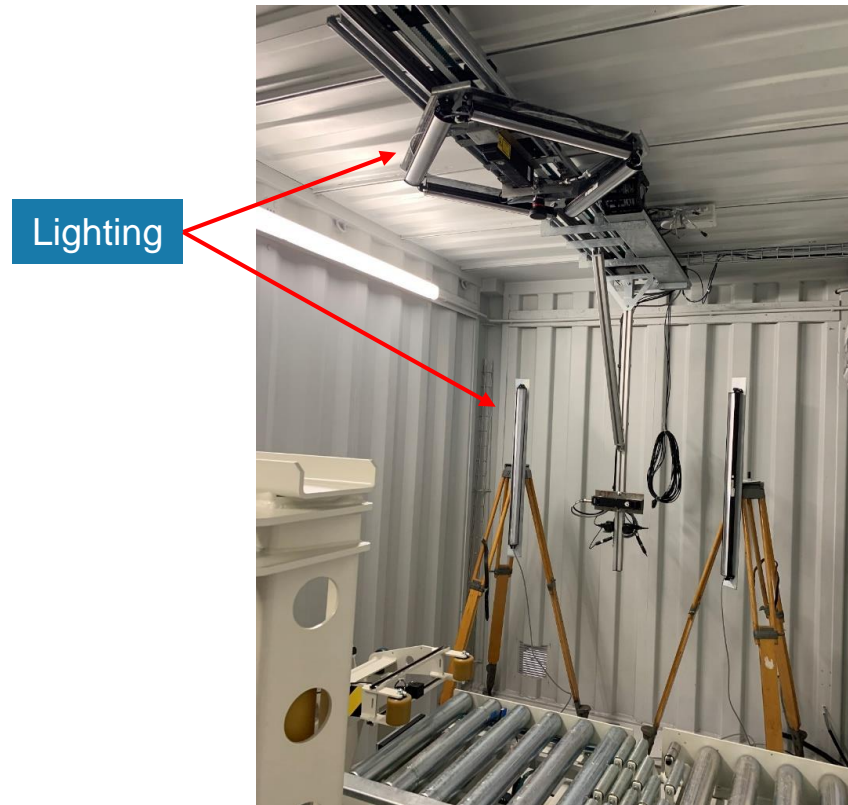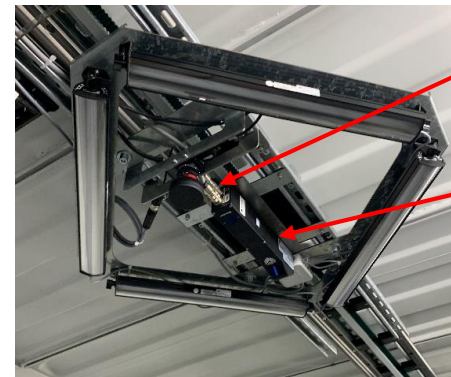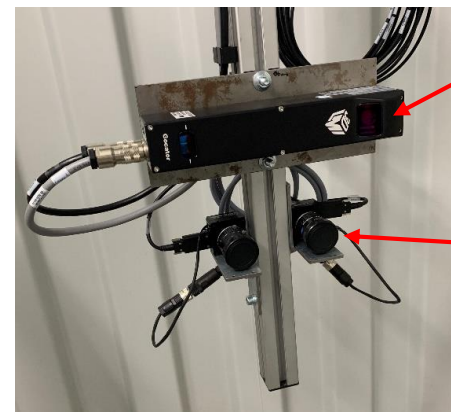

# Inspection process

- Step 1.1 – Drum coat und drum top scan

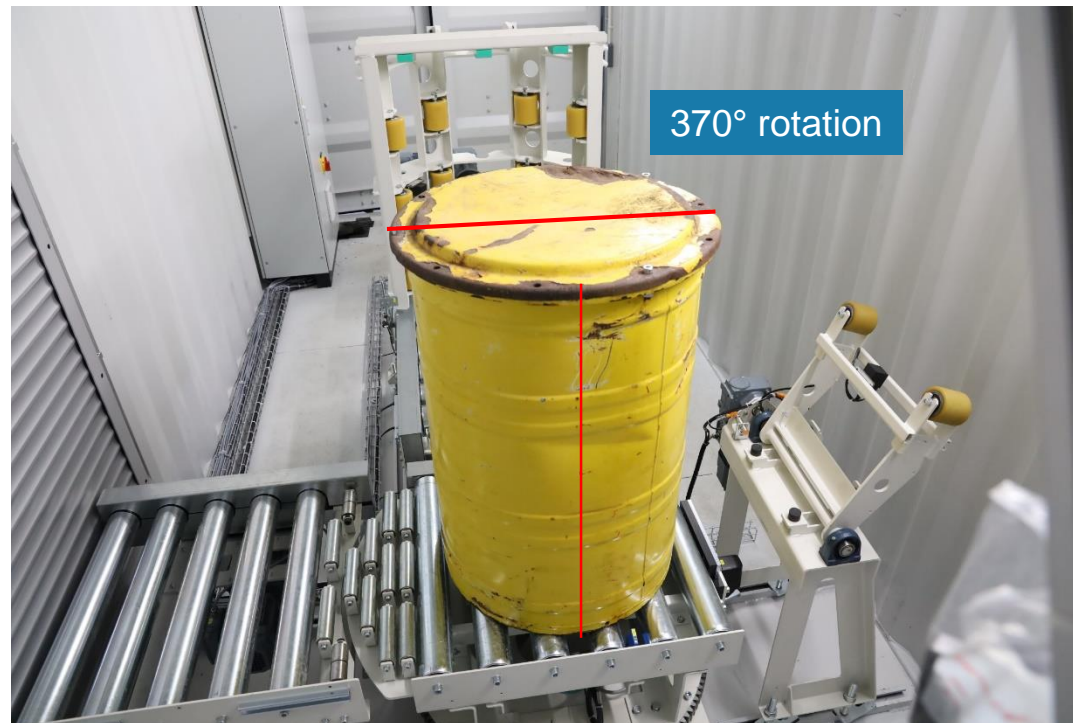

# Pre-tests result

- Elevation map of the unwound drum coat – New drum

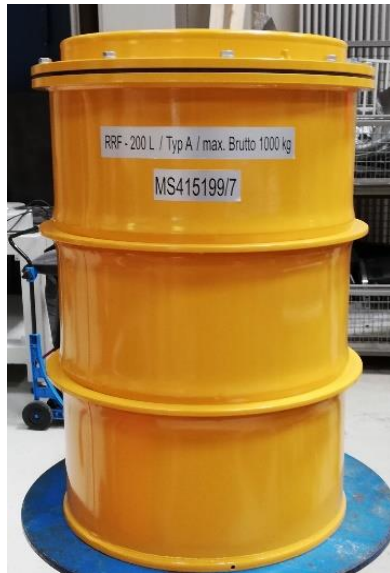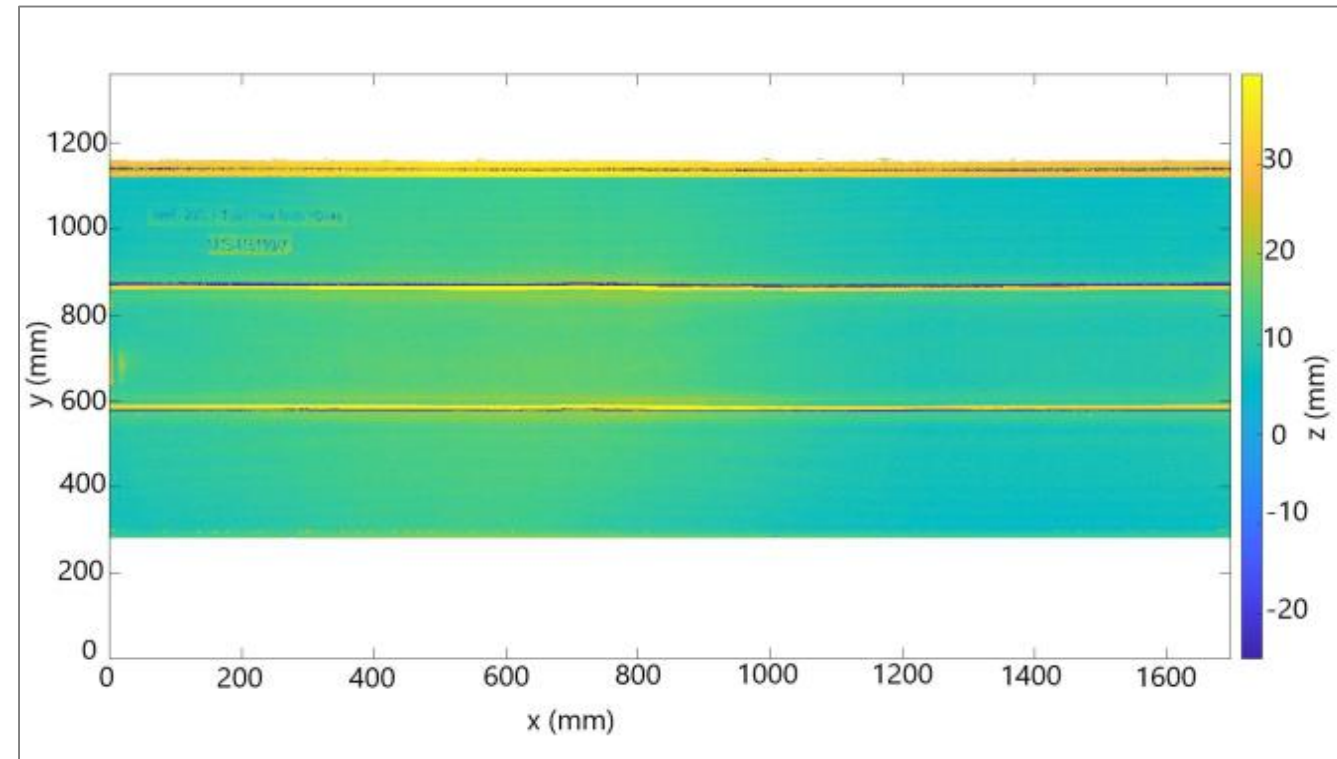

# Pre-tests result

- Elevation map of the unwound drum coat – Used drum

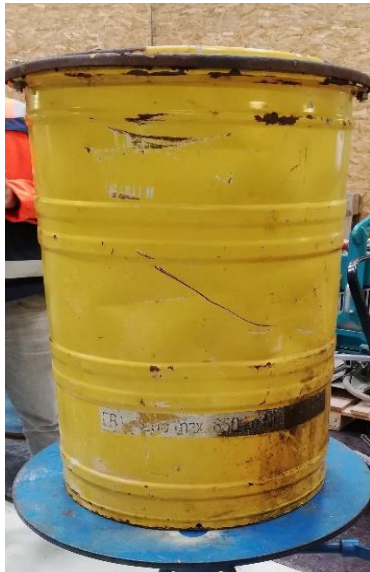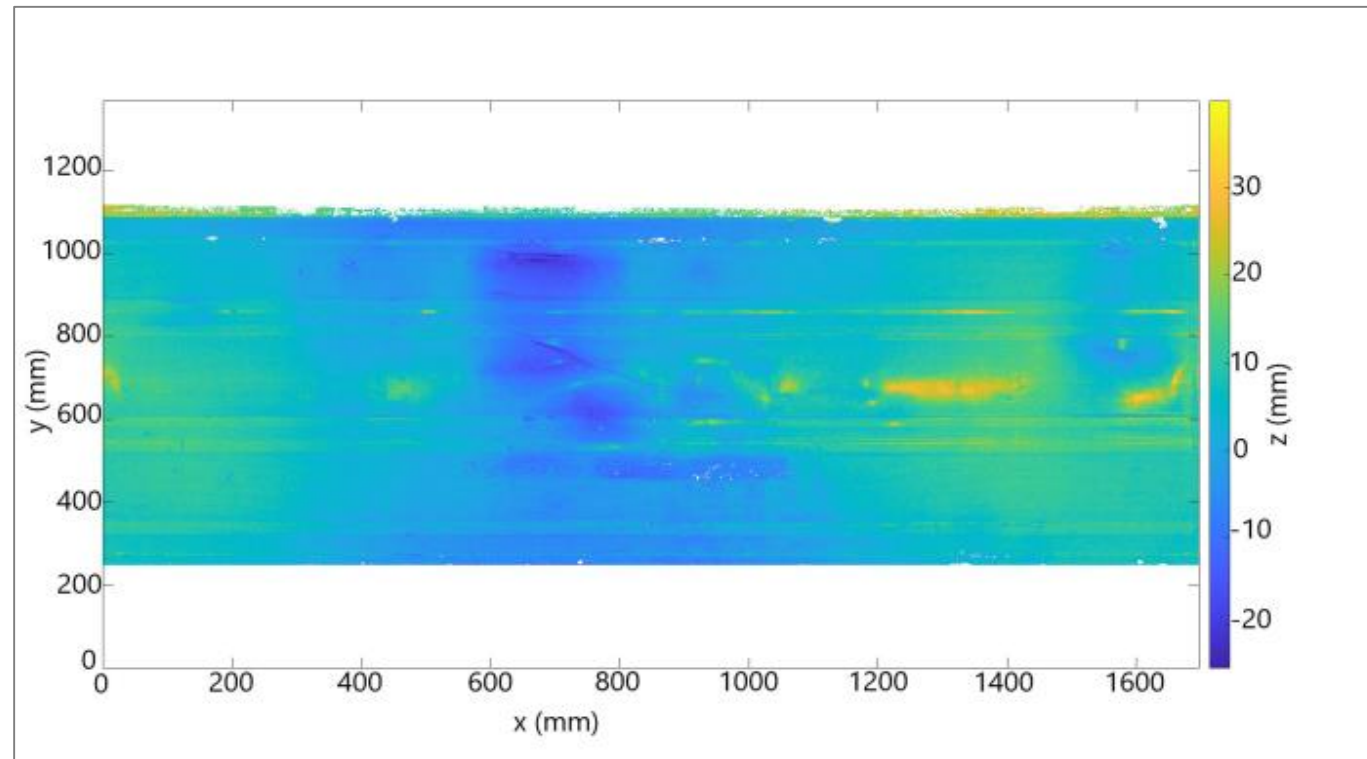

# Inspection process

## ■ Step 1.2 – Drum coat und drum top photograph

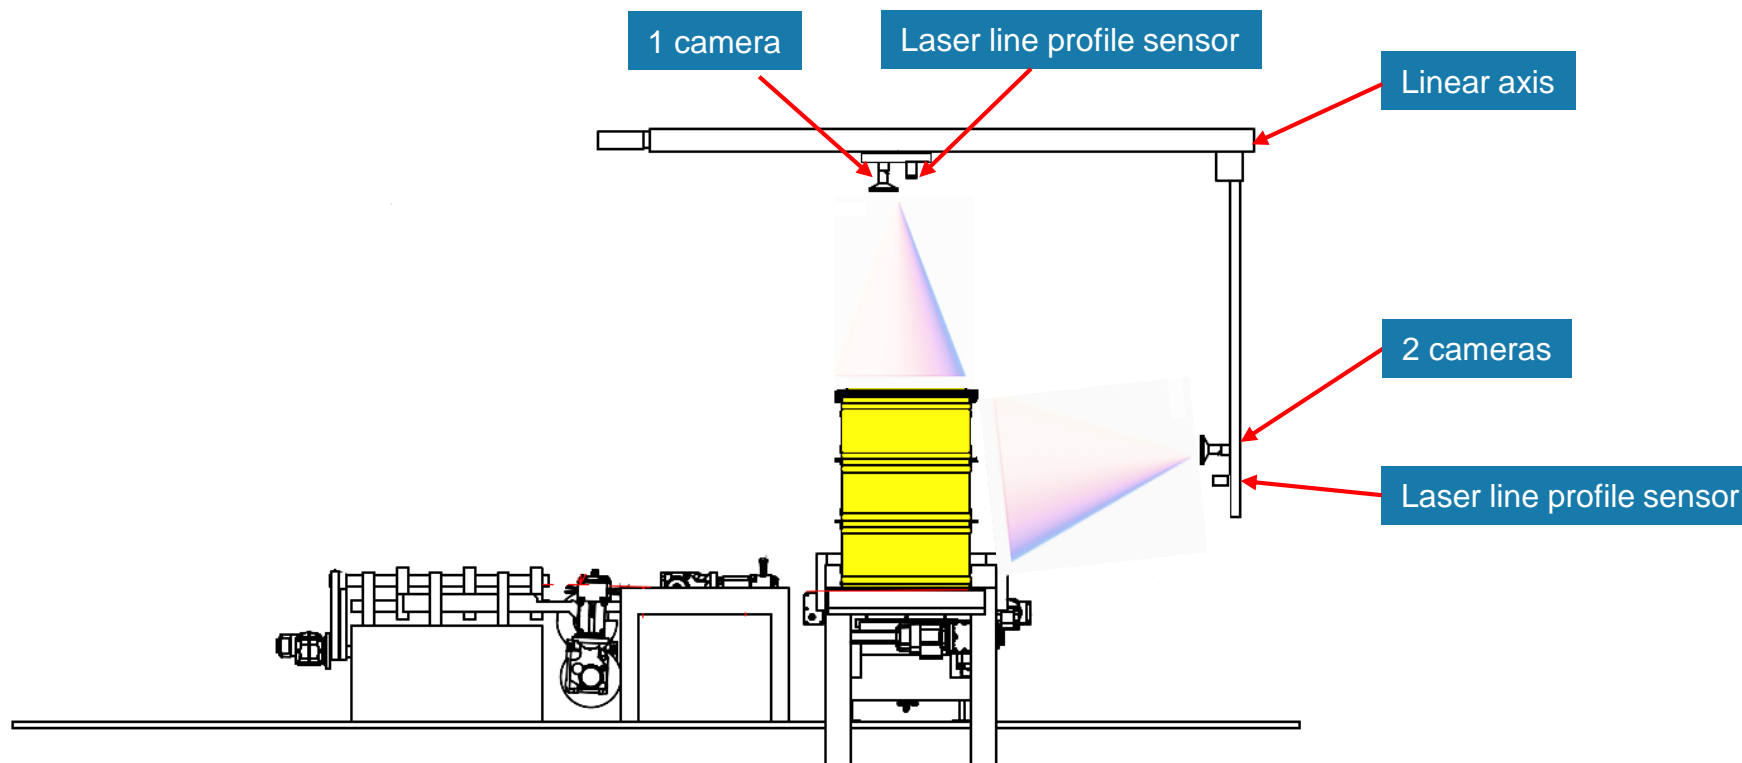

# Pre-tests result

- Profile of the drum top with texture

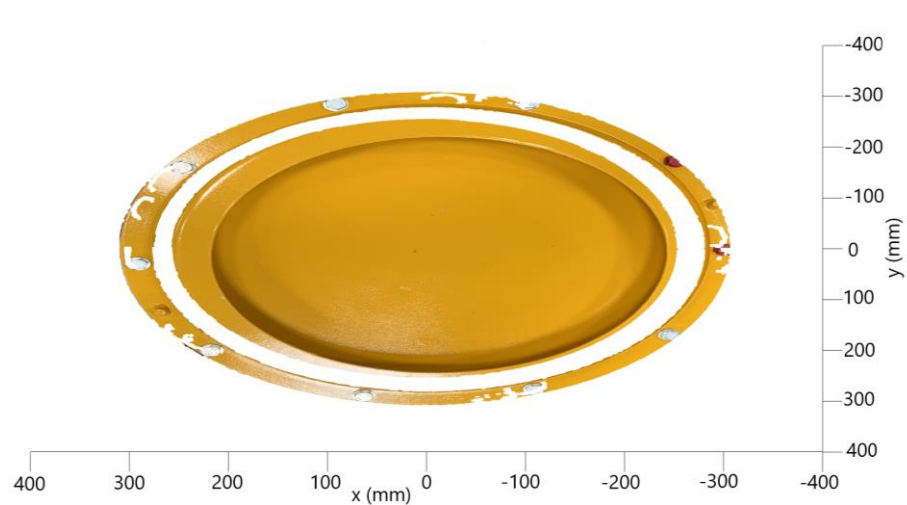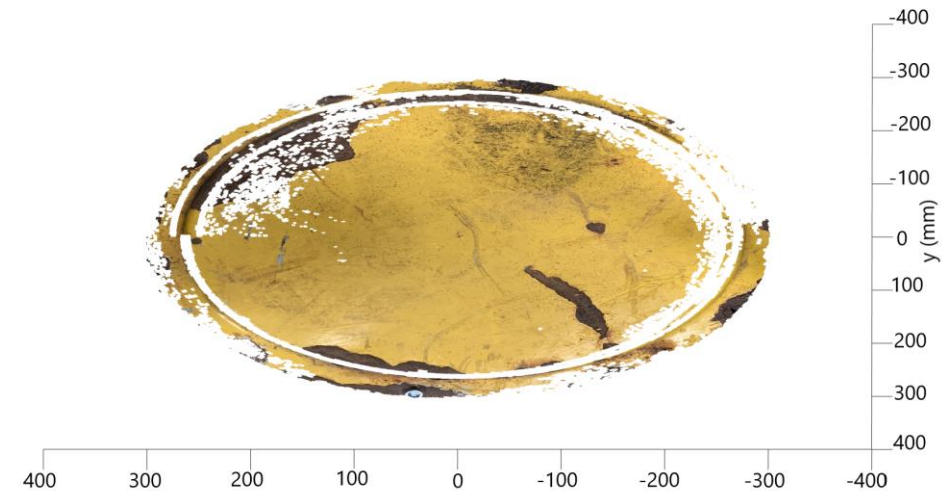

# Inspection process

- **Step 2:** Drum is carried to the **tipping system** and gets tipped

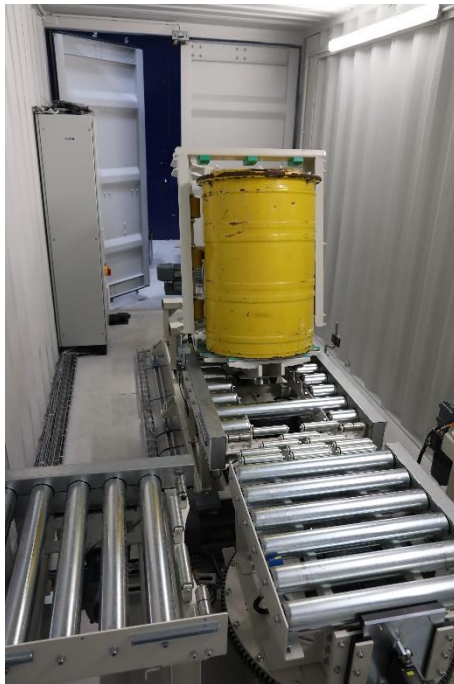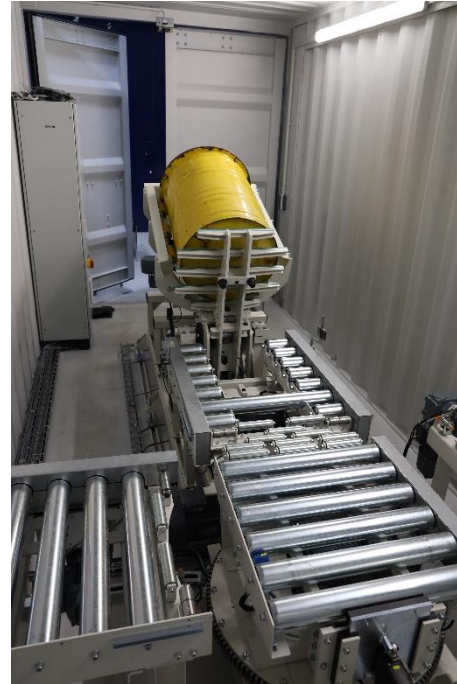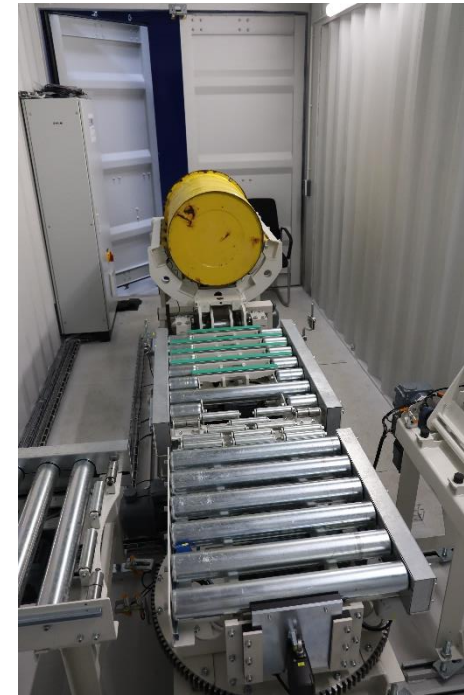



# Inspection process

## ■ Step 2.1 – Drum bottom scan und photograph

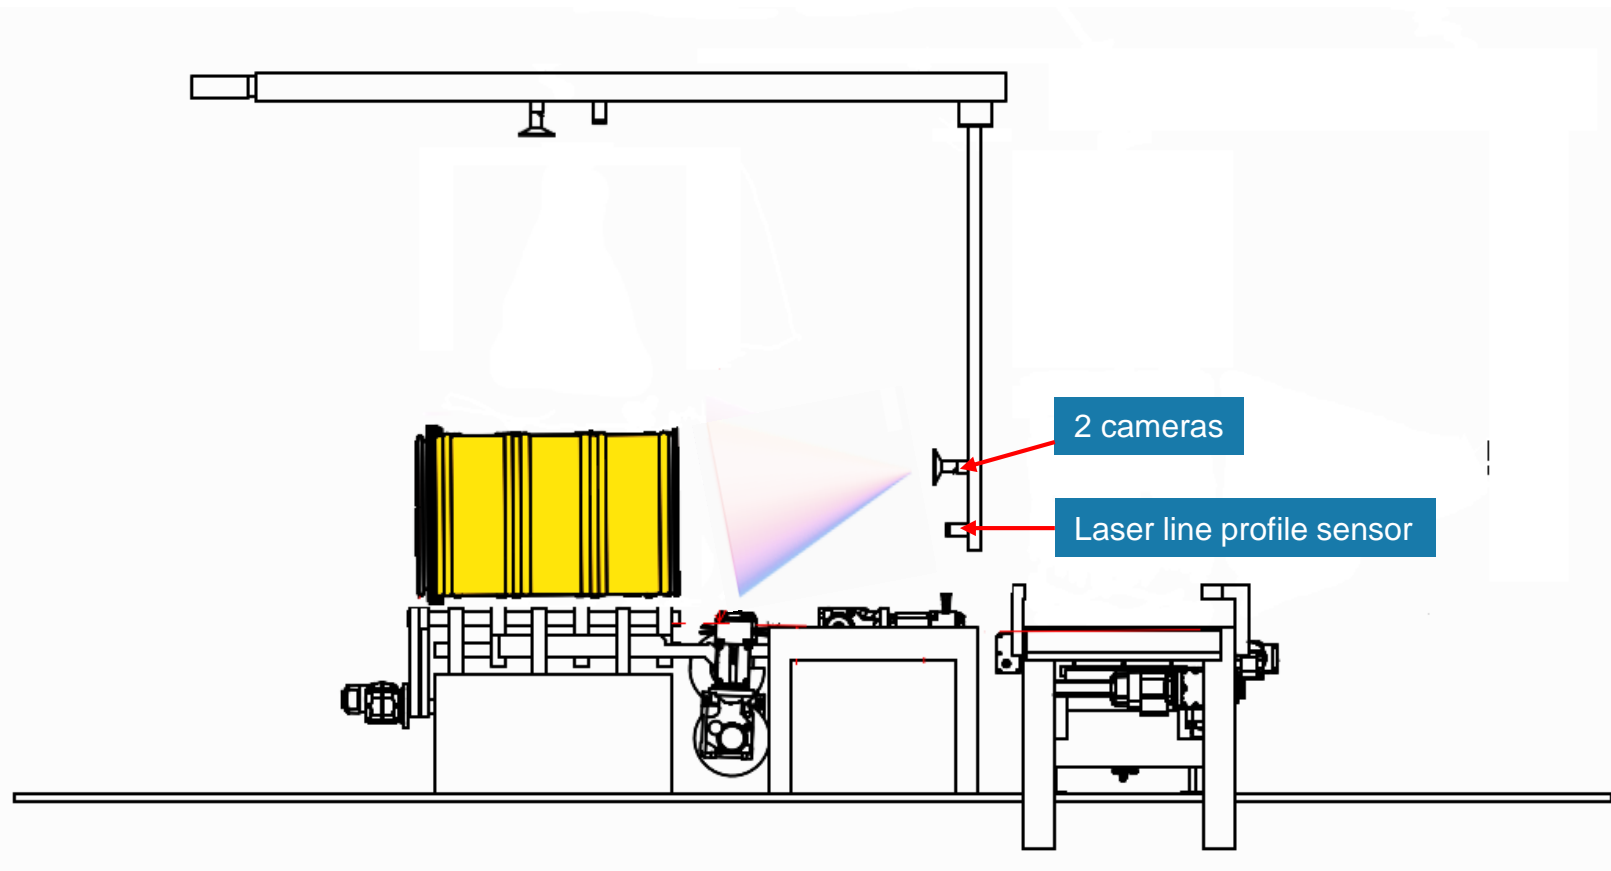

# Outlook

## ■ Time line

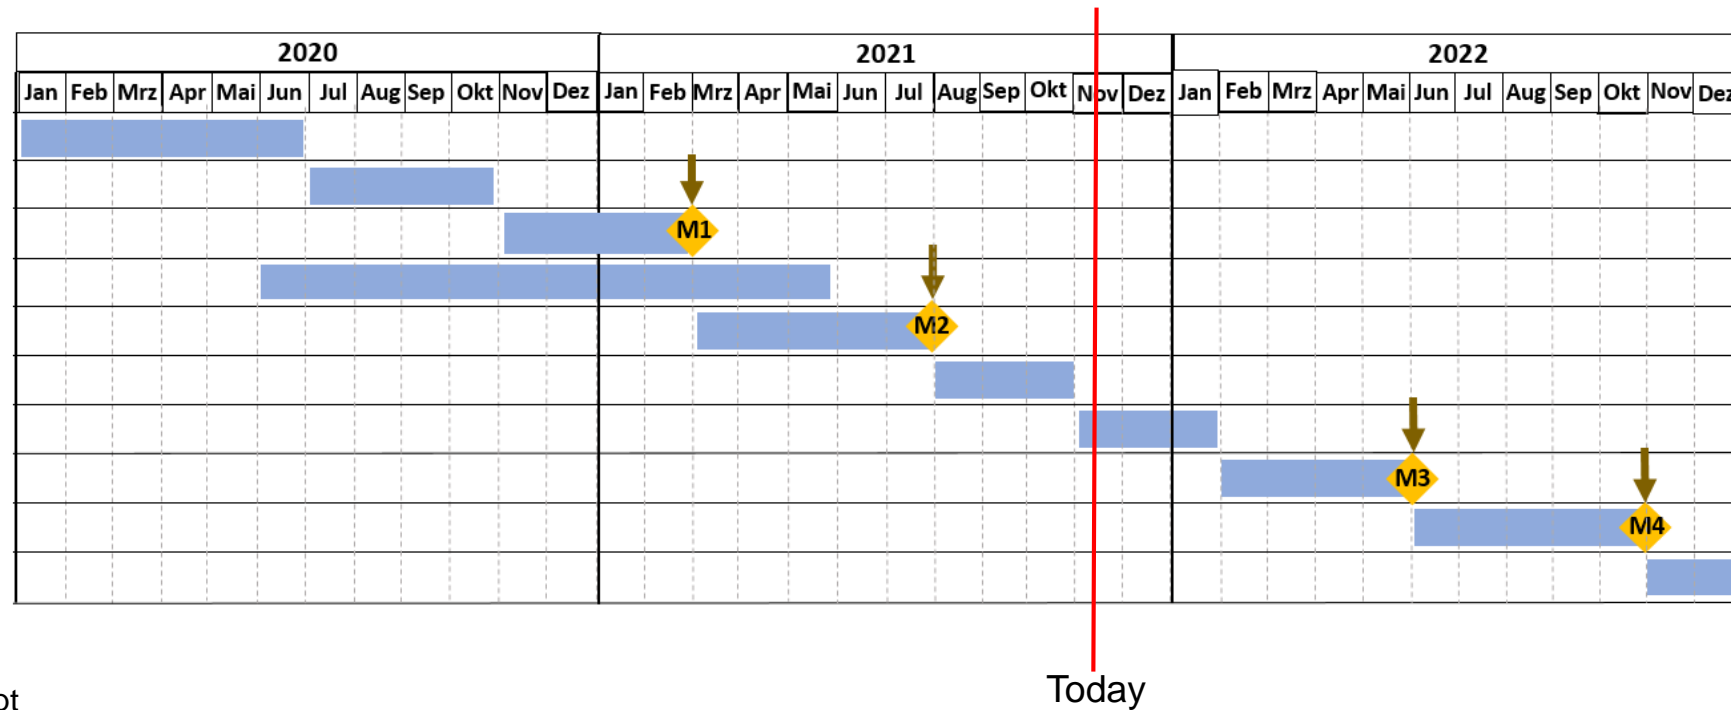

### Milestones

**M1** Finished Concept

**M2** Demonstrator 1.0

**M3** Final maturity Demonstrator 1.0

**M4** Final maturity Demonstrator 2.0

**Thank you very much for your attention!**
